# Supplementary material
Source: PubMed Central journal article supplement (PMC4974373)
Supplement: 10.1074_M116.719237_jbc.M116.719237-1.pdf [file 10.1074_M116.719237_jbc.M116.719237-1.pdf]

## Supplemental Data

### **Combining single-strand oligodeoxynucleotide and CRISPR/CAS9 to correct the gene mutation in $\beta$ -thalassemia induced Pluripotent Stem Cell**

Xiaohua Niu<sup>1</sup>, Wenyin He<sup>1</sup>, Bing Song<sup>1</sup>, Zhanhui Ou<sup>1</sup>, Di Fan<sup>1</sup>, Yuchang Chen<sup>1</sup>, Yong Fan<sup>1</sup>, Xiaofang Sun<sup>1,2</sup>

**Supplementary Figure1.** The whole exome sequencing to detect the top 10 predicted off-target sites of gRNA1 in the exome.

Through the whole exome sequencing, the figures showed sequence results of the 10 off-target sites of gRNA1 in the exome.

**Supplementary Table1.** The top 10 predicted off-target sites in the exome.

**Supplementary Table2.** The involved genes of each variants detected by microarray and exome sequencing.

**Supplementary Table3.** The primers used in the manuscript.

# Supplementary Figure1. The whole exome sequencing to detect the top 10 predicted off-target sites of gRNA1 in the exome.

## Offtarget site 1

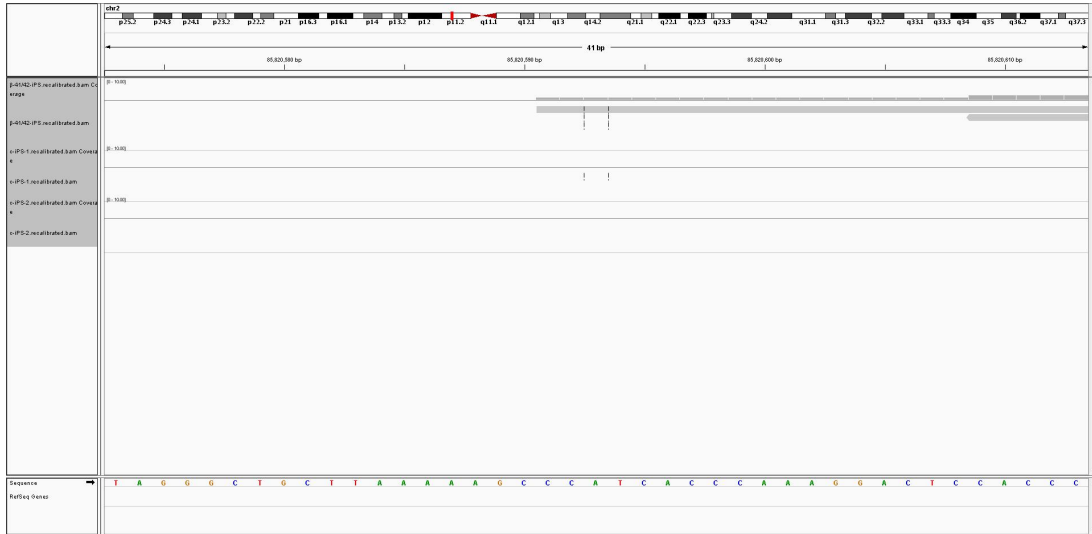

## Offtarget site2

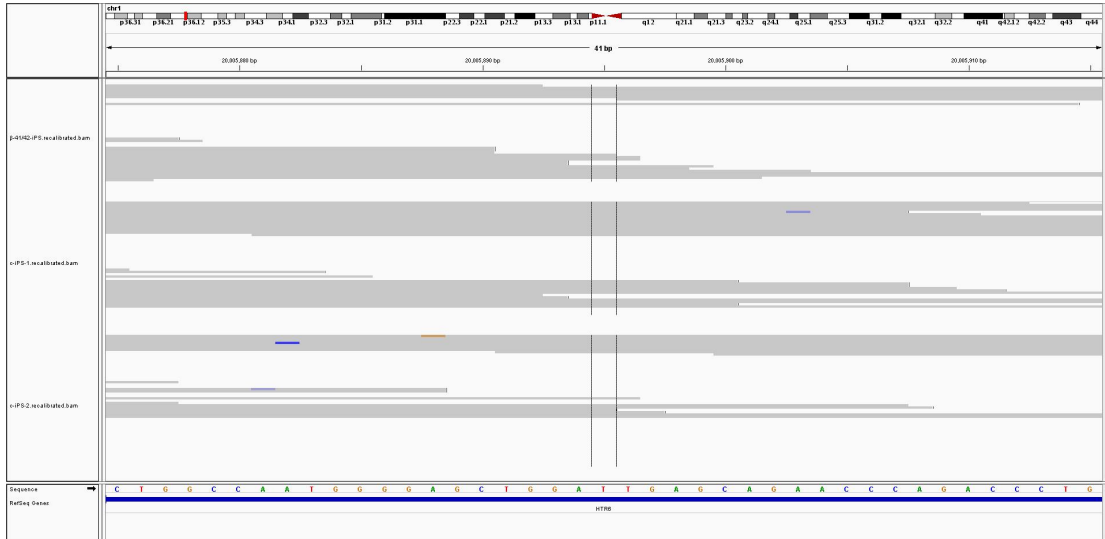

# Offtarget site3

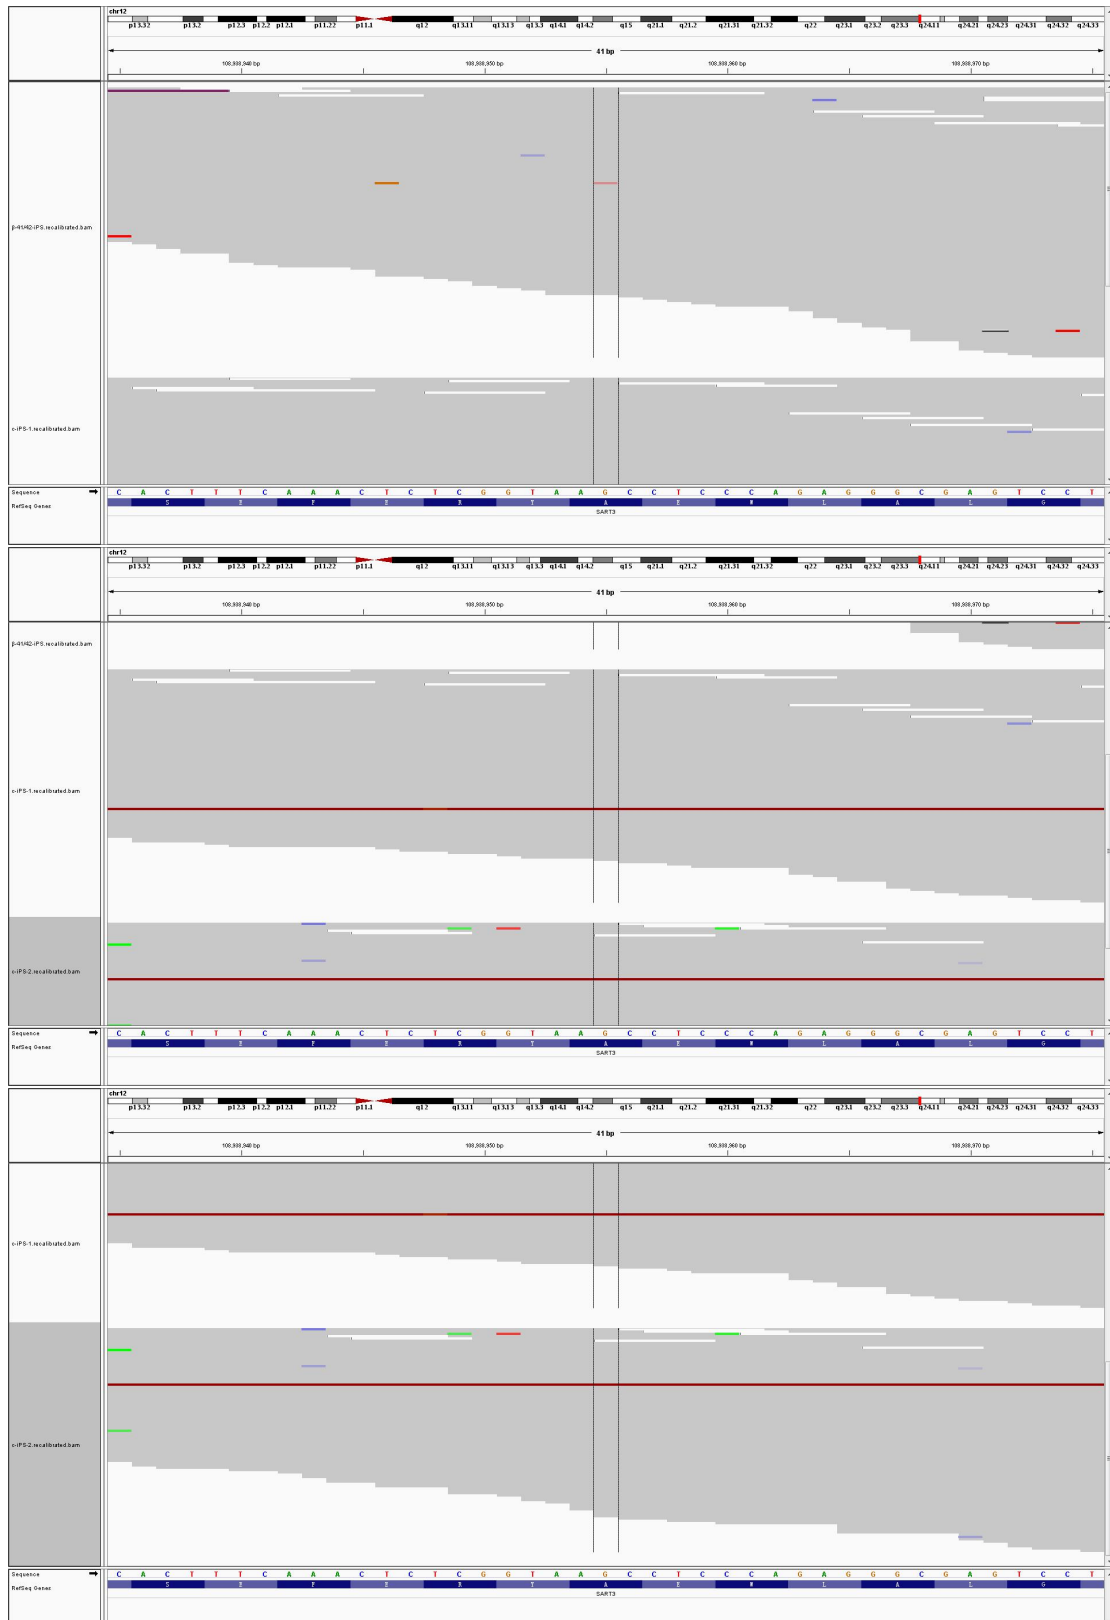

# Offtarget site 4

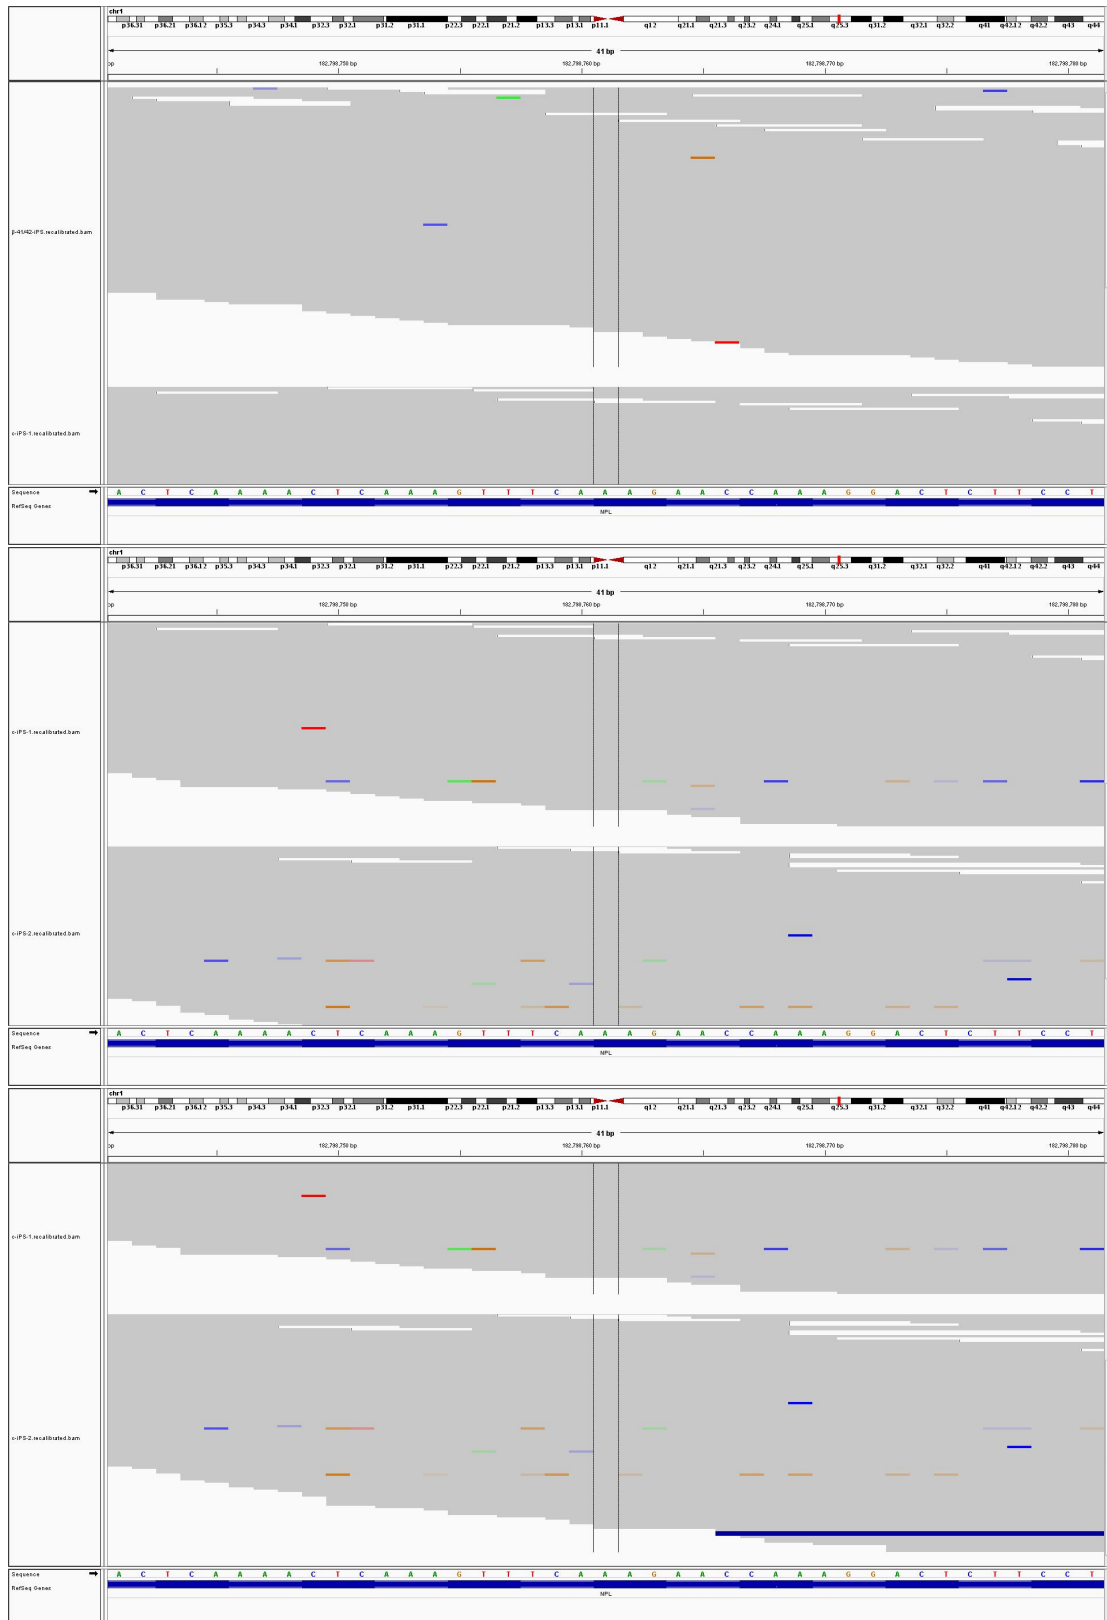

## Offtarget 5

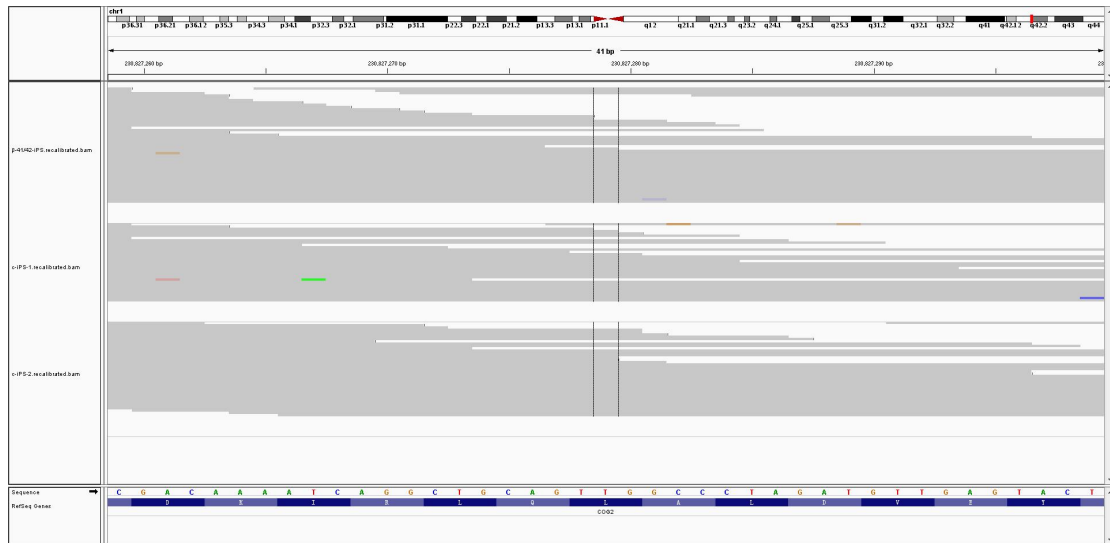

## Offtarget 6

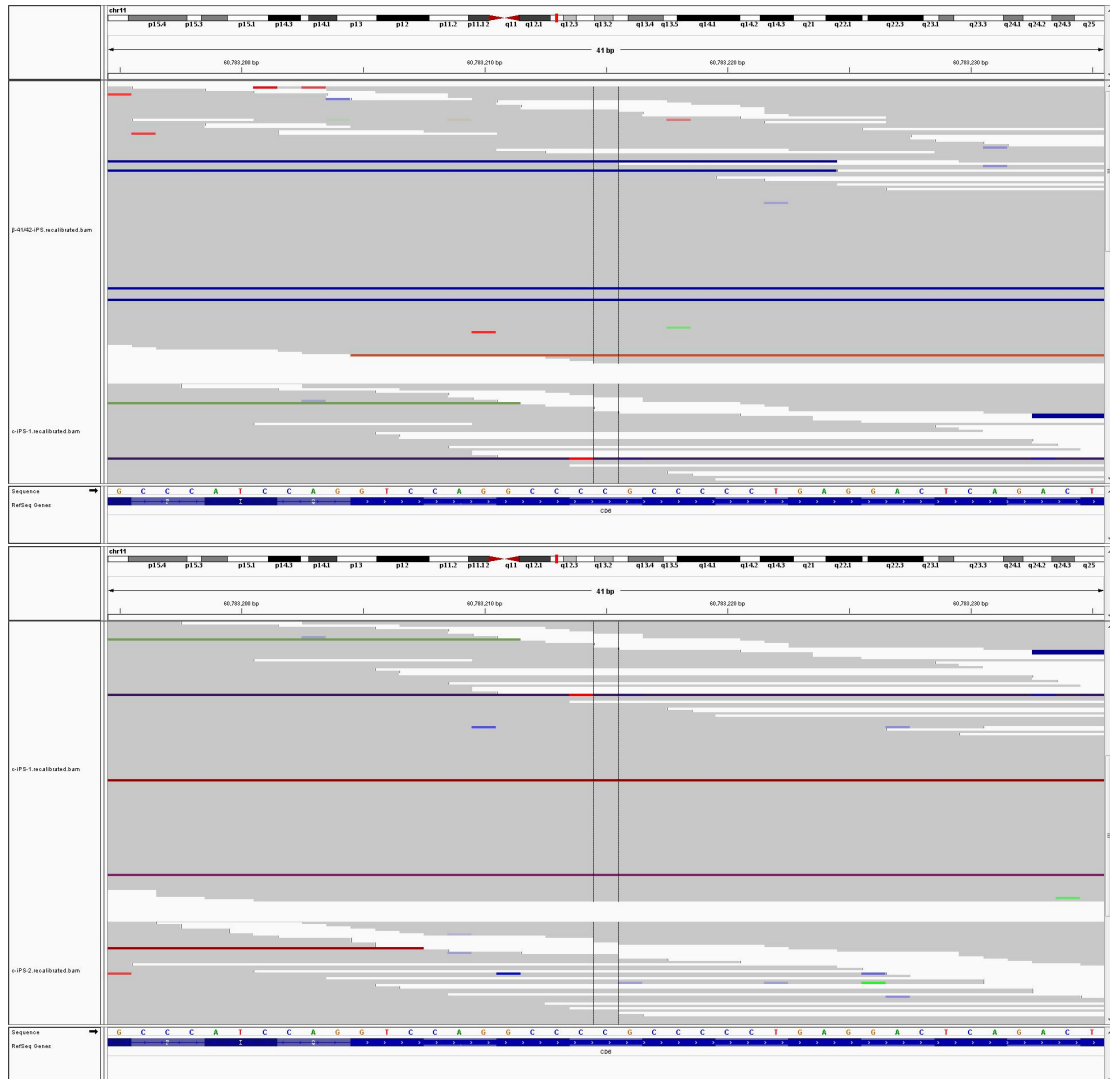

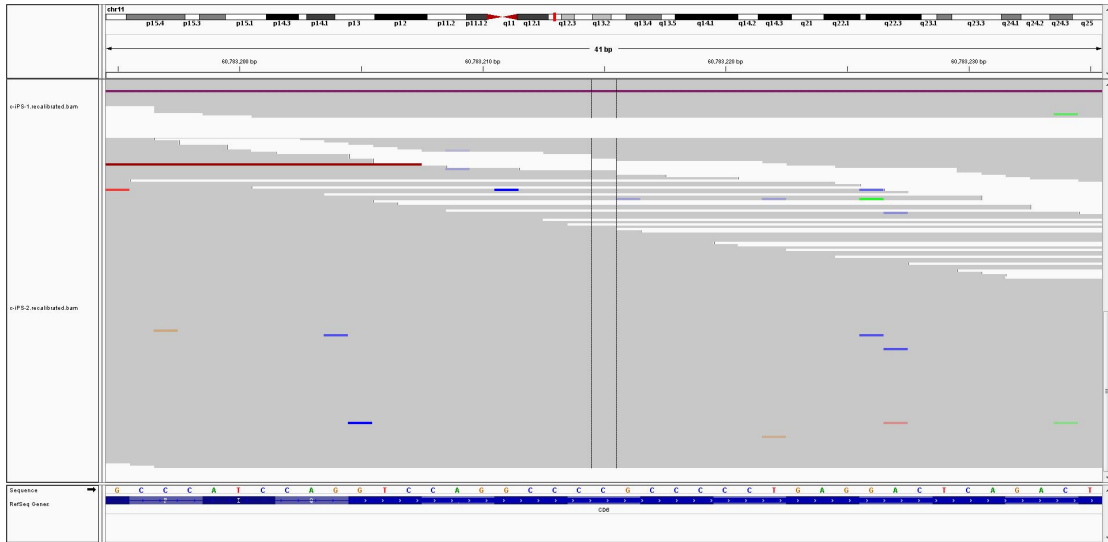

### Offtarget 7

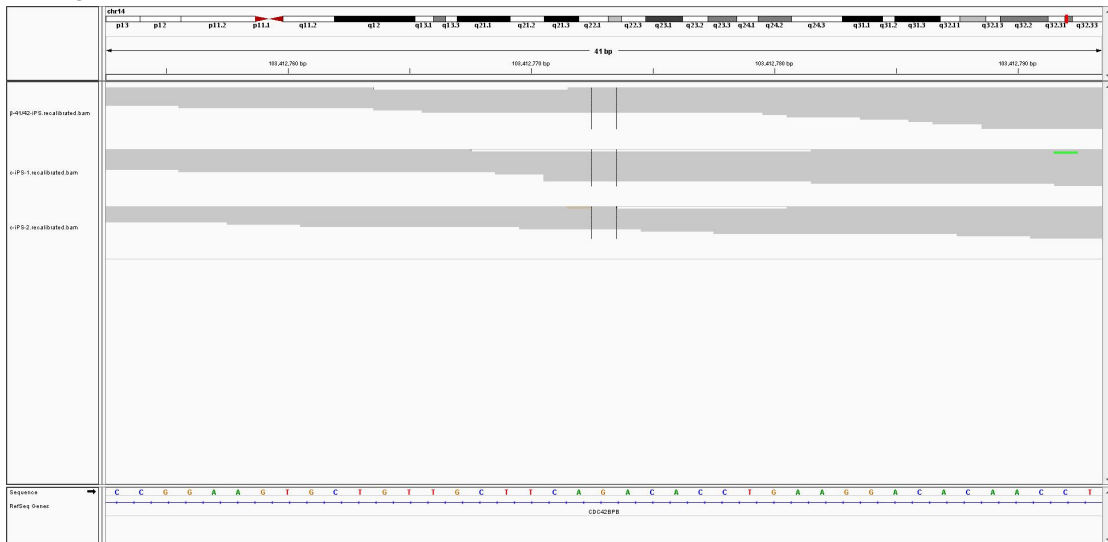

### Offtarget 8

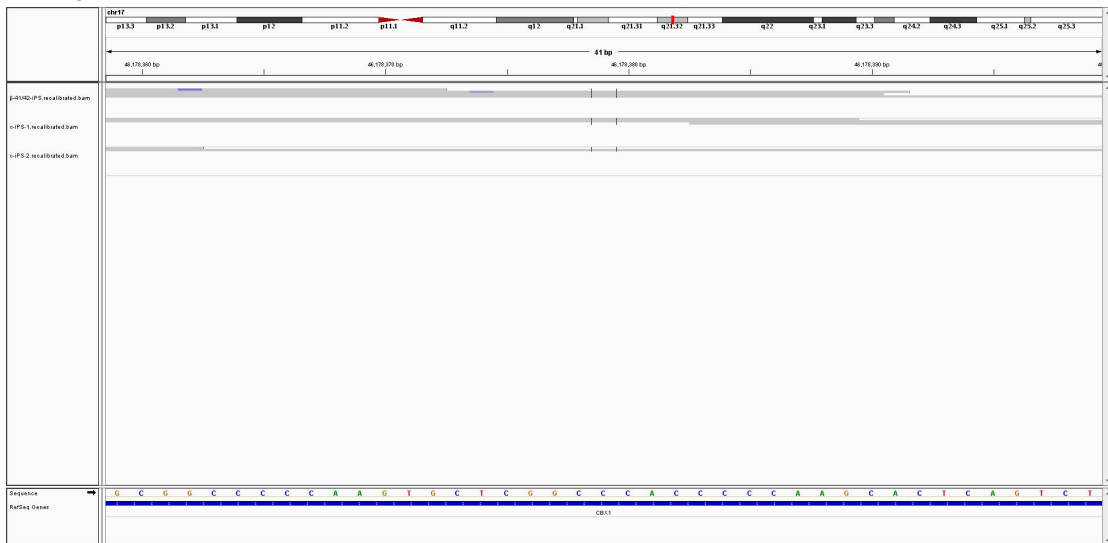

## Offtarget 9

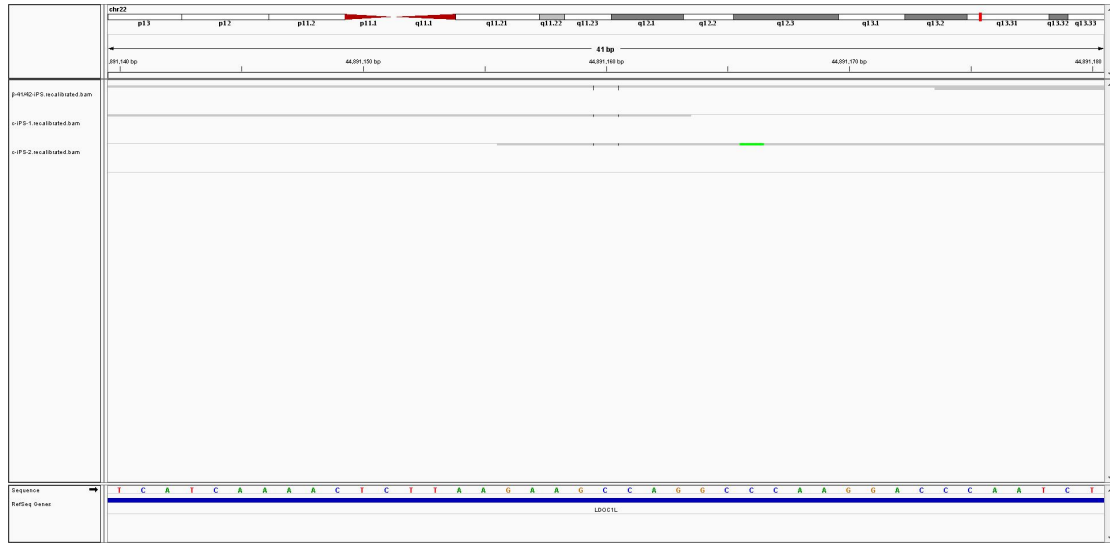

## Offtarget 10

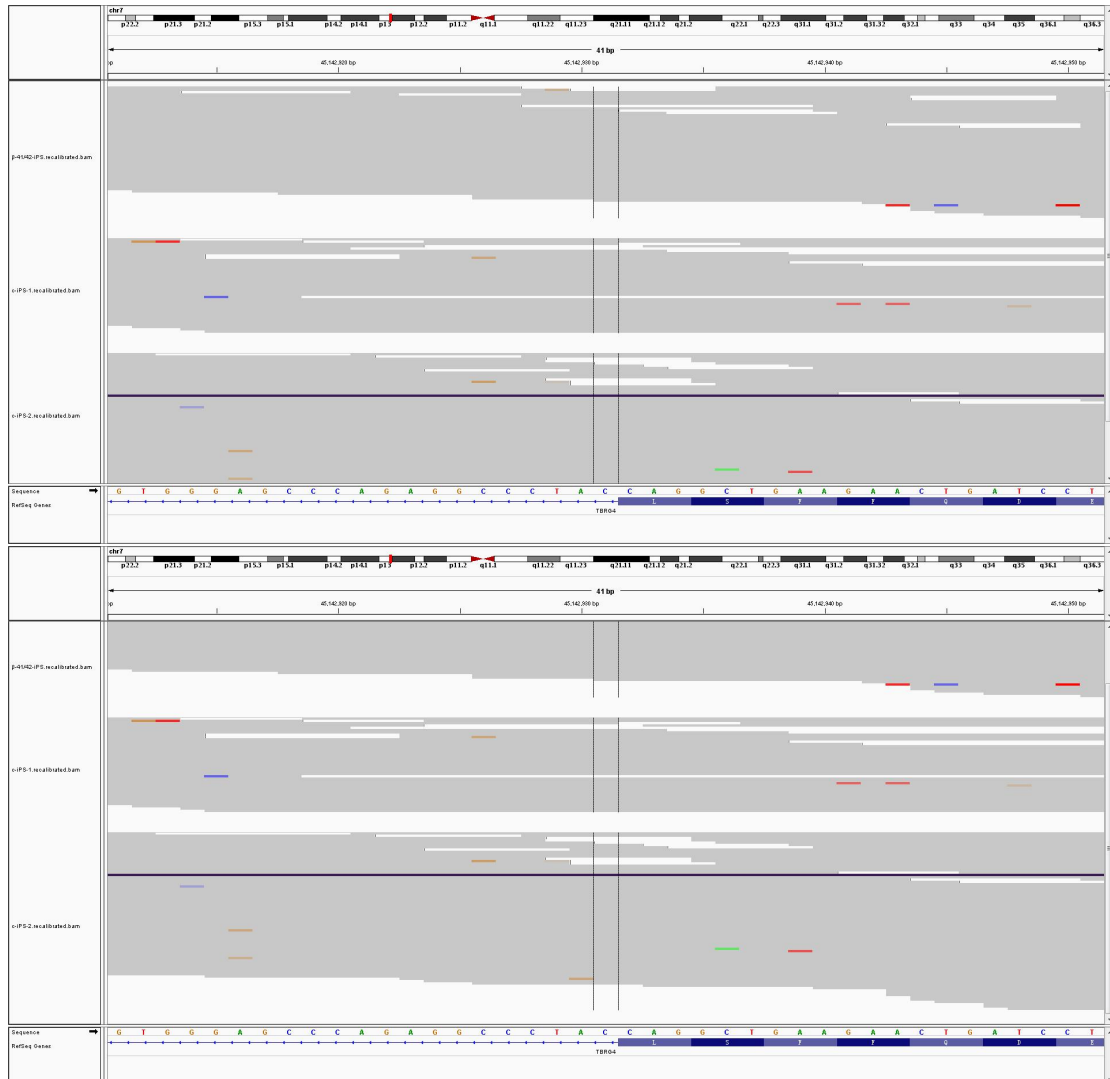

**Supplementary Table1.The top 10 predicted off-target sites in the exome.**

|             |                      |              |                  |
|-------------|----------------------|--------------|------------------|
| HBB gRNA1   | GACCCAGAGGTTGAGTCCTT |              |                  |
| OFFTARGET1  | CTCCCAGGGGTGGAGTCCTT | NM_006634    | chr2:-85820593   |
| OFFTARGET2  | AACCCAGACCCTGAGTCCTT | NM_000871    | chr1:+20005901   |
| OFFTARGET3  | CTCCCAGAGGGCGAGTCCTT | NM_014706    | chr12:+108938955 |
| OFFTARGET4  | TGCCCAGAGGAAGAGTCCTT | NM_001200051 | chr1:-182798761  |
| OFFTARGET5  | GCCCTAGATGTTGAGTACTT | NM_001145036 | chr1:+230827279  |
| OFFTARGET6  | GAGCCAGAGTCTGAGTCCTC | NR_045638    | chr11:-60783215  |
| OFFTARGET7  | GTCCCAAAGGTTGTGTCCTT | NM_006035    | chr14:-103412773 |
| OFFTARGET8  | GAGCCAGAGACTGAGTGCTT | NM_006807    | chr17:-46178379  |
| OFFTARGET9  | ATCCCAGAGATTGGGTCCTT | NM_032287    | chr22:-44891160  |
| OFFTARGET10 | GACCAAGAGGATCAGTTCTT | NM_001261834 | chr7:-45142931   |



**Supplementary Table2. The involved genes of each variants detected by microarray and exome sequencing.**

| Method        | Variants (to $\beta$ -41/42-iPS)  | Reffered Gene                                                         | Gene ID                           | PANTHER Family/Subfamily                                                 |                                   |                                                  |
|---------------|-----------------------------------|-----------------------------------------------------------------------|-----------------------------------|--------------------------------------------------------------------------|-----------------------------------|--------------------------------------------------|
| Microarray    | Duplication                       | DEFB115                                                               | HUMAN HGNC=18096 UniProtKB=Q30KQ5 | BETA-DEFENSIN 115 (PTHR15001:SF20)                                       |                                   |                                                  |
|               |                                   | DEFB116                                                               | HUMAN HGNC=18097 UniProtKB=Q30KQ4 | BETA-DEFENSIN 116 (PTHR15001:SF17)                                       |                                   |                                                  |
|               |                                   | <b>DEFB118#</b>                                                       | HUMAN HGNC=16196 UniProtKB=Q96PH6 | BETA-DEFENSIN 118 (PTHR15001:SF24)                                       |                                   |                                                  |
|               |                                   | DEFB119                                                               | HUMAN HGNC=18099 UniProtKB=Q8N690 | BETA-DEFENSIN 119 (PTHR15001:SF6)                                        |                                   |                                                  |
|               |                                   | DEFB121                                                               | HUMAN HGNC=18101 UniProtKB=Q5J5C9 | BETA-DEFENSIN 121 (PTHR15001:SF30)                                       |                                   |                                                  |
|               |                                   | DEFB122                                                               | /                                 | /                                                                        |                                   |                                                  |
|               |                                   | DEFB123                                                               | HUMAN HGNC=18103 UniProtKB=Q8N688 | BETA-DEFENSIN 123 (PTHR15001:SF3)                                        |                                   |                                                  |
|               |                                   | DEFB124                                                               | HUMAN HGNC=18104 UniProtKB=Q8NES8 | BETA-DEFENSIN 124 (PTHR15001:SF1)                                        |                                   |                                                  |
|               |                                   | <b>REM1</b>                                                           | HUMAN HGNC=15922 UniProtKB=O75628 | GTP-BINDING PROTEIN REM 1 (PTHR24070:SF260)                              |                                   |                                                  |
|               |                                   | LINC00028                                                             | /                                 | /                                                                        |                                   |                                                  |
|               |                                   | <b>HM13</b>                                                           | HUMAN HGNC=16435 UniProtKB=Q8TCT9 | MINOR HISTOCOMPATIBILITY ANTIGEN H13 (PTHR12174:SF23)                    |                                   |                                                  |
|               |                                   | PSIMCT-1                                                              | /                                 | /                                                                        |                                   |                                                  |
|               |                                   | HM13-AS1                                                              | /                                 | /                                                                        |                                   |                                                  |
|               |                                   | <b>ID1</b>                                                            | HUMAN HGNC=5360 UniProtKB=P41134  | DNA-BINDING PROTEIN INHIBITOR ID-1 (PTHR11723:SF4)                       |                                   |                                                  |
|               |                                   | MIR3193                                                               | /                                 | /                                                                        |                                   |                                                  |
|               |                                   | <b>COX4I2</b>                                                         | HUMAN HGNC=16232 UniProtKB=Q96KJ9 | CYTOCHROME C OXIDASE SUBUNIT 4 ISOFORM 2, MITOCHONDRIAL (PTHR10707:SF11) |                                   |                                                  |
|               |                                   | <b>BCL2L1</b>                                                         | HUMAN HGNC=992 UniProtKB=Q07817   | BCL-2-LIKE PROTEIN 1 (PTHR11256:SF12)                                    |                                   |                                                  |
|               |                                   | <b>TPX2</b>                                                           | HUMAN HGNC=1249 UniProtKB=Q9ULW0  | TARGETING PROTEIN FOR XKLP2 (PTHR14326:SF9)                              |                                   |                                                  |
|               |                                   | <b>MYLK2</b>                                                          | HUMAN HGNC=16243 UniProtKB=Q9H1R3 | MYOSIN LIGHT CHAIN KINASE 2, SKELETAL/CARDIAC MUSCLE (PTHR24347:SF118)   |                                   |                                                  |
|               |                                   | <b>FOXS1</b>                                                          | HUMAN HGNC=3735 UniProtKB=O43638  | FORKHEAD BOX PROTEIN S1 (PTHR11829:SF68)                                 |                                   |                                                  |
|               |                                   | DUSP15                                                                | HUMAN HGNC=16190 UniProtKB=Q9H1R2 | DUAL SPECIFICITY PROTEIN PHOSPHATASE 15 (PTHR10159:SF30)                 |                                   |                                                  |
|               |                                   | TTL9                                                                  | HUMAN HGNC=16118 UniProtKB=Q3SXZ7 | TUBULIN POLYGLUTAMYLASE TTL9-RELATED (PTHR12241:SF39)                    |                                   |                                                  |
|               |                                   | <b>PDRG1</b>                                                          | HUMAN HGNC=16119 UniProtKB=Q9NUG6 | P53 AND DNA DAMAGE-REGULATED PROTEIN 1 (PTHR21162:SF0)                   |                                   |                                                  |
|               |                                   | XKR7                                                                  | HUMAN HGNC=23062 UniProtKB=Q5GH72 | XK-RELATED PROTEIN 7 (PTHR32129:SF9)                                     |                                   |                                                  |
|               |                                   | C20orf160                                                             | /                                 | /                                                                        |                                   |                                                  |
|               |                                   | <b>HCK</b>                                                            | HUMAN HGNC=4840 UniProtKB=P08631  | TYROSINE-PROTEIN KINASE HCK (PTHR24418:SF245)                            |                                   |                                                  |
|               |                                   | TM9SF4                                                                | HUMAN HGNC=30797 UniProtKB=Q92544 | TRANSMEMBRANE 9 SUPERFAMILY MEMBER 4 (PTHR10766:SF55)                    |                                   |                                                  |
|               |                                   | TSPY26P                                                               | HUMAN HGNC=16256 UniProtKB=Q9H489 | TESTIS-SPECIFIC Y-ENCODED-LIKE PROTEIN 3-RELATED (PTHR11875:SF51)        |                                   |                                                  |
|               |                                   | <b>PLAGL2</b>                                                         | HUMAN HGNC=9047 UniProtKB=Q9UPG8  | ZINC FINGER PROTEIN PLAGL2 (PTHR10032:SF124)                             |                                   |                                                  |
|               |                                   | POFUT1                                                                | HUMAN HGNC=14988 UniProtKB=Q9H488 | GDP-FUCOSE PROTEIN O-FUCOSYLTRANSFERASE 1 (PTHR21420:SF3)                |                                   |                                                  |
|               |                                   | Exon sequencing                                                       | INDEL                             | MTMR11                                                                   | HUMAN HGNC=24307 UniProtKB=A4FU01 | MYOTUBULARIN-RELATED PROTEIN 11 (PTHR10807:SF51) |
|               |                                   |                                                                       |                                   | MTR                                                                      | HUMAN HGNC=7468 UniProtKB=Q99707  | METHIONINE SYNTHASE (PTHR21091:SF112)            |
| HGC63         | /                                 |                                                                       |                                   | /                                                                        |                                   |                                                  |
| FAM90A1       | HUMAN HGNC=25526 UniProtKB=Q86YD7 |                                                                       |                                   | PROTEIN FAM90A1 (PTHR16035:SF9)                                          |                                   |                                                  |
| CCT6B         | HUMAN HGNC=1621 UniProtKB=Q92526  |                                                                       |                                   | T-COMPLEX PROTEIN 1 SUBUNIT ZETA-2 (PTHR11353:SF58)                      |                                   |                                                  |
| OR7E24        | HUMAN HGNC=8396 UniProtKB=Q6IFN5  |                                                                       |                                   | OLFACTORY RECEPTOR 7E24 (PTHR26451:SF173)                                |                                   |                                                  |
| MCM8          | HUMAN HGNC=16147 UniProtKB=Q9UJA3 |                                                                       |                                   | DNA HELICASE MCM8 (PTHR11630:SF47)                                       |                                   |                                                  |
| TMEM191B      | HUMAN HGNC=33600 UniProtKB=P0C7N4 |                                                                       |                                   | /                                                                        |                                   |                                                  |
| BEX5          | HUMAN HGNC=27990 UniProtKB=Q5H9J7 |                                                                       |                                   | PROTEIN BEX5 (PTHR19430:SF0)                                             |                                   |                                                  |
| ZFHX4         | HUMAN HGNC=30939 UniProtKB=Q86UP3 |                                                                       |                                   | ZINC FINGER HOMEBOX PROTEIN 4 (PTHR24208:SF40)                           |                                   |                                                  |
| HTT           | HUMAN HGNC=4851 UniProtKB=P42858  |                                                                       |                                   | HUNTINGTIN (PTHR10170:SF10)                                              |                                   |                                                  |
| FBXO46        | HUMAN HGNC=25069 UniProtKB=Q6PJ61 |                                                                       |                                   | F-BOX ONLY PROTEIN 46 (PTHR16271:SF10)                                   |                                   |                                                  |
| GSE1          | HUMAN HGNC=28979 UniProtKB=Q14687 |                                                                       |                                   | GENETIC SUPPRESSOR ELEMENT 1 (PTHR17608:SF4)                             |                                   |                                                  |
| <b>GABRG2</b> | HUMAN HGNC=4087 UniProtKB=P18507  |                                                                       |                                   | GAMMA-AMINOBUTYRIC ACID RECEPTOR SUBUNIT GAMMA-2 (PTHR18945:SF498)       |                                   |                                                  |
| SPRN          | HUMAN HGNC=16871 UniProtKB=Q5BIV9 |                                                                       |                                   | SHADOW OF PRION PROTEIN (PTHR28552:SF1)                                  |                                   |                                                  |
| BUD13         | HUMAN HGNC=28199 UniProtKB=Q9BRD0 |                                                                       |                                   | BUD13 HOMOLOG (PTHR31809:SF0)                                            |                                   |                                                  |
| MMP17         | HUMAN HGNC=7163 UniProtKB=Q9ULZ9  |                                                                       |                                   | MATRIX METALLOPROTEINASE-17 (PTHR10201:SF21)                             |                                   |                                                  |
| A4GALT        | HUMAN HGNC=18149 UniProtKB=Q9NPC4 |                                                                       |                                   | LACTOSYL CERAMIDE 4-ALPHA-GALACTOSYLTRANSFERASE (PTHR12042:SF17)         |                                   |                                                  |
| GRID21P       | /                                 | /                                                                     |                                   |                                                                          |                                   |                                                  |
| PIK3R2        | HUMAN HGNC=8980 UniProtKB=O00459  | PHOSPHATIDYLINOSITOL 3-KINASE REGULATORY SUBUNIT BETA (PTHR10155:SF1) |                                   |                                                                          |                                   |                                                  |

# Red text indicated pathogenic genes in OMIM, while yellow text indicated likely pathogenic genes

**Supplementary Table 3. The primers used in the manuscript.**

| <b>The Primers Used To Assembly The gRNA Vector</b>                |                                                                                            |                                          |
|--------------------------------------------------------------------|--------------------------------------------------------------------------------------------|------------------------------------------|
|                                                                    | FORWARD                                                                                    | REVERSE                                  |
| gRNA1                                                              | CACCGACCCAGAGGTTGAGTCCTT                                                                   | AAACAAGGACTCAACCTCTGGGTC                 |
| gRNA2                                                              | CACCGCCCAGAGGTTGAGTCCTTTG                                                                  | AAACCAAAGGACTCAACCTCTGGGC                |
| gRNA3                                                              | CACCGCCCCAAAGGACTCAACCTC                                                                   | AAACTTGGACCCAGAGGTTGAGTCC                |
| gRNA4                                                              | CACCGGACTCAACCTCTGGGTCCA                                                                   | AAACTGGACCCAGAGGTTGAGTCC                 |
| gRNA5                                                              | CACCGACTCAACCTCTGGGTCAA                                                                    | AAACTTGGACCCAGAGGTTGAGTC                 |
| <b>The Primers For PCR Assay To Selection The Corrected Clones</b> |                                                                                            |                                          |
| P1                                                                 | CAAGACAGGTTTAAGGAGAC                                                                       |                                          |
| P2                                                                 | CTTATCCCCTTCCTATGACA                                                                       |                                          |
| P3                                                                 | AGATCCCCAAAGGACTCAAAGA                                                                     |                                          |
| P4                                                                 | TTGGACCCAGAGGTTCTTTGAG                                                                     |                                          |
| <b>The Primers Used For T7E1 Assay</b>                             |                                                                                            |                                          |
|                                                                    | FORWARD                                                                                    | REVERSE                                  |
| HBB                                                                | GAAAACATCAAGCGTCCCA                                                                        | GGCAGGTTGGTATCAAGGTT                     |
| <b>The Primers Used For Gene Expression Assay</b>                  |                                                                                            |                                          |
|                                                                    | FORWARD                                                                                    | REVERSE                                  |
| OCT3/4                                                             | GAAGGTATTCAGCCAAACGA                                                                       | GGCCGCAGCTTACACAT                        |
| NANOG                                                              | AGAATAGCAATGGTGTGCGC                                                                       | GTTGCTCCAGGTTGAATTGT                     |
| SOX2                                                               | ACCAGCTCGCAGACCTACAT                                                                       | ACTTGACCACCGAACCCAT                      |
| ACTIN                                                              | ACCTTCTACAATGAGCTGCG                                                                       | CCTGGATAGCAACGTACATGG                    |
| HBB                                                                | CTCGGTGCCTTTAGTGATGG                                                                       | ACACAGACCAGCACGTTG                       |
| HBG1                                                               | AATGTGGAAGATGCTGGAGG                                                                       | GCCAAAGCTGTCAAAGAACC                     |
| CD71                                                               | ACTTGCCAGATGTTCTCAG                                                                        | GTATCCCCTAGCCATTCAGTG                    |
| <b>The Primers Used For SSA System Construct</b>                   |                                                                                            |                                          |
|                                                                    | FORWARD                                                                                    | REVERSE                                  |
| INSERT                                                             | GCATGGTACCTTCTCAGGGATACACGTGT<br>G                                                         | CAGAAGATCTGTGCAAAGAGGCATGATAC            |
| 5'GFP<br>ARM                                                       | TTAAGCTTATGCCACAACCATGGTGAGC<br>AA                                                         | CAGAAGATCTTTAGGGCGGACTGGGTGCTCAGGT<br>AG |
| 3'GFP<br>ARM                                                       | GCATGGTACCCATCGAGCTGAAGGGCAT<br>CGACT                                                      | GCTCTAGATTACTTGTACAGCTCGTCCATGC          |
| HBB<br>DONOR<br>SSODN                                              | CCACCCTTAGGCTGCTGGTGGTCTACCCTTGACCCAGAGGTTCTTTGAGTCCTTTGGGGATCTG<br>TCCACTCCTGATGCTGTTATGG |                                          |
